# Supplementary material for: Identification of MBW Complex Components Implicated in the Biosynthesis of Flavonoids in Woodland Strawberry
Source: Front Plant Sci. 2021 Nov 8;12:774943. doi: 10.3389/fpls.2021.774943 (PMC8606683; doi:10.3389/fpls.2021.774943)
Supplement: Supplementary file 7 [file Table_6.XLS]

## Sheet: Supplementary Table 3-FvMYB5-id
Supplementary Table 6. The identity of protein sequences among FvMYB41, VvMYB5b and FnMYB5.
Sequence Identity Matrix
Seq->	FvMYB42	VvMYB5b	FnMYB5
FvMYB42	1	0.564	0.45
VvMYB5b		1	0.476
FnMYB5			1
